# Supplementary material for: Spatial Variability of COVID-19 Hospitalization in the Silesian Region, Poland
Source: MDPI journal article supplement (doi:10.3390/ijerph19159007), 2022-07-25

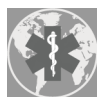

## Supplement 1

A. Number of hospitalized due to COVID-19 and dead COVID-19 patients, values of crude and standardized rates of morbidity due to COVID-19 (n/100,000), and values of in-hospital mortality due to COVID-19 in the Silesian Voivodeship in 2020 by poviats

| Year           |                     | 2020                            |                                              |                                                     |                         |                           |                                               |                                               |                                               |                                                     |                                                      |                                                        |
|----------------|---------------------|---------------------------------|----------------------------------------------|-----------------------------------------------------|-------------------------|---------------------------|-----------------------------------------------|-----------------------------------------------|-----------------------------------------------|-----------------------------------------------------|------------------------------------------------------|--------------------------------------------------------|
| Code of poviat | Poviat              | Number of hospitalized patients | Crude morbidity rate [n/100,000 inhabitants] | Standardized morbidity rate [n/100,000 inhabitants] | Number of dead patients | In-hospital mortality [%] | Number of hospitalized patients age <65 years | Number of hospitalized patients age 65+ years | Number of dead patients without comorbidities | Number of dead patients with one coexisting disease | Number of dead patients with two coexisting diseases | Number of dead patients with three coexisting diseases |
| 2401           | będziński           | 404                             | 274.3                                        | 188.8                                               | 92                      | 22.8%                     | 180                                           | 224                                           | 33                                            | 33                                                  | 9                                                    | 17                                                     |
| 2402           | bielski             | 523                             | 314.4                                        | 240.5                                               | 87                      | 16.6%                     | 211                                           | 312                                           | 20                                            | 18                                                  | 17                                                   | 32                                                     |
| 2461           | Bielsko-Biała       | 555                             | 326.9                                        | 211.0                                               | 102                     | 18.4%                     | 175                                           | 380                                           | 19                                            | 14                                                  | 30                                                   | 39                                                     |
| 2414           | bieruński-łędziński | 125                             | 208.9                                        | 165.3                                               | 27                      | 21.6%                     | 61                                            | 64                                            | 6                                             | 3                                                   | 8                                                    | 10                                                     |
| 2462           | Bytom               | 418                             | 256.0                                        | 165.4                                               | 101                     | 24.2%                     | 175                                           | 243                                           | 24                                            | 20                                                  | 17                                                   | 40                                                     |
| 2463           | Chorzów             | 268                             | 250.8                                        | 164.5                                               | 57                      | 21.3%                     | 107                                           | 161                                           | 13                                            | 5                                                   | 12                                                   | 27                                                     |
| 2403           | cieszyński          | 1996                            | 1124.3                                       | 745.5                                               | 146                     | 7.3%                      | 825                                           | 1171                                          | 18                                            | 12                                                  | 37                                                   | 79                                                     |
| 2464           | Częstochowa         | 888                             | 408.2                                        | 241.3                                               | 180                     | 20.3%                     | 292                                           | 596                                           | 36                                            | 20                                                  | 45                                                   | 79                                                     |
| 2404           | częstochowski       | 485                             | 361.7                                        | 243.3                                               | 83                      | 17.1%                     | 172                                           | 313                                           | 13                                            | 10                                                  | 23                                                   | 37                                                     |
| 2465           | Dąbrowa Górnicza    | 206                             | 174.2                                        | 120.9                                               | 40                      | 19.4%                     | 90                                            | 116                                           | 13                                            | 8                                                   | 8                                                    | 11                                                     |
| 2466           | Gliwice             | 558                             | 315.2                                        | 201.7                                               | 159                     | 28.5%                     | 199                                           | 359                                           | 80                                            | 18                                                  | 34                                                   | 27                                                     |
| 2405           | gliwicki            | 410                             | 355.2                                        | 256.3                                               | 77                      | 18.8%                     | 169                                           | 241                                           | 33                                            | 12                                                  | 13                                                   | 19                                                     |
| 2467           | Jastrzębie-Zdrój    | 344                             | 390.7                                        | 260.6                                               | 71                      | 20.6%                     | 135                                           | 209                                           | 28                                            | 12                                                  | 15                                                   | 16                                                     |
| 2468           | Jaworzno            | 70                              | 77.5                                         | 55.6                                                | 15                      | 21.4%                     | 34                                            | 36                                            | 7                                             | 3                                                   | 1                                                    | 4                                                      |
| 2469           | Katowice            | 815                             | 280.5                                        | 178.6                                               | 158                     | 19.4%                     | 368                                           | 447                                           | 62                                            | 31                                                  | 20                                                   | 45                                                     |
| 2406           | kłobucki            | 263                             | 311.9                                        | 214.5                                               | 54                      | 20.5%                     | 107                                           | 156                                           | 9                                             | 13                                                  | 9                                                    | 23                                                     |
| 2407           | lubliniecki         | 257                             | 337.7                                        | 240.4                                               | 66                      | 25.7%                     | 106                                           | 151                                           | 20                                            | 2                                                   | 14                                                   | 30                                                     |
| 2408           | mikołowski          | 269                             | 271.2                                        | 204.2                                               | 52                      | 19.3%                     | 135                                           | 134                                           | 7                                             | 11                                                  | 7                                                    | 27                                                     |
| 2470           | Mysłowice           | 142                             | 190.5                                        | 134.6                                               | 38                      | 26.8%                     | 59                                            | 83                                            | 2                                             | 11                                                  | 5                                                    | 20                                                     |

|      |                      |      |        |       |     |       |     |     |    |    |    |    |
|------|----------------------|------|--------|-------|-----|-------|-----|-----|----|----|----|----|
| 2409 | myszkowski           | 215  | 305.0  | 209.3 | 49  | 22.8% | 102 | 113 | 9  | 14 | 10 | 16 |
| 2471 | Piekary Śląskie      | 153  | 279.7  | 185.5 | 29  | 19.0% | 51  | 102 | 7  | 13 | 3  | 6  |
| 2410 | pszczyński           | 286  | 255.8  | 208.2 | 51  | 17.8% | 124 | 162 | 17 | 7  | 15 | 12 |
| 2411 | raciborski           | 460  | 428.3  | 301.6 | 88  | 19.1% | 197 | 263 | 35 | 15 | 21 | 17 |
| 2472 | Ruda Śląska          | 316  | 231.6  | 162.6 | 64  | 20.3% | 134 | 182 | 22 | 6  | 8  | 28 |
| 2412 | rybnicki             | 658  | 841.8  | 685.6 | 80  | 12.2% | 400 | 258 | 24 | 20 | 19 | 17 |
| 2473 | Rybnik               | 1508 | 1099.7 | 878.2 | 149 | 9.9%  | 943 | 565 | 54 | 39 | 40 | 16 |
| 2474 | Siemianowice Śląskie | 83   | 125.2  | 80.1  | 19  | 22.9% | 37  | 46  | 9  | 1  | 4  | 5  |
| 2475 | Sosnowiec            | 389  | 196.9  | 125.6 | 82  | 21.1% | 159 | 230 | 20 | 22 | 13 | 27 |
| 2476 | Świętochłowice       | 146  | 297.3  | 181.2 | 25  | 17.1% | 44  | 102 | 9  | 6  | 1  | 9  |
| 2413 | tarnogórski          | 363  | 257.8  | 172.0 | 74  | 20.4% | 134 | 229 | 16 | 10 | 21 | 27 |
| 2477 | Tychy                | 355  | 279.8  | 191.0 | 87  | 24.5% | 132 | 223 | 21 | 15 | 15 | 36 |
| 2415 | wodzisławski         | 932  | 595.2  | 423.4 | 158 | 17.0% | 404 | 528 | 49 | 26 | 47 | 36 |
| 2478 | Zabrze               | 473  | 276.7  | 174.7 | 84  | 17.8% | 180 | 293 | 25 | 12 | 18 | 29 |
| 2416 | zawierciański        | 458  | 392.6  | 257.5 | 85  | 18.5% | 199 | 259 | 14 | 10 | 8  | 53 |
| 2479 | Żory                 | 273  | 434.4  | 353.2 | 46  | 16.8% | 153 | 120 | 19 | 10 | 9  | 8  |
| 2417 | żywiecki             | 408  | 268.1  | 185.5 | 85  | 20.8% | 137 | 271 | 12 | 16 | 19 | 38 |

B. Number of hospitalized due to COVID-19 and dead COVID-19 patients, values of crude and standardized rates of morbidity due to COVID-19 (n/100,000), and values of in-hospital mortality due to COVID-19 in the Silesian Voivodeship in 2021 by poviats

| Year           |                     | 2021                            |                                              |                                                     |                         |                           |                                               |                                               |                                               |                                                     |                                                     |                                                       |
|----------------|---------------------|---------------------------------|----------------------------------------------|-----------------------------------------------------|-------------------------|---------------------------|-----------------------------------------------|-----------------------------------------------|-----------------------------------------------|-----------------------------------------------------|-----------------------------------------------------|-------------------------------------------------------|
| Code of poviat | Poviat              | Number of hospitalized patients | Crude morbidity rate [n/100,000 inhabitants] | Standardized morbidity rate [n/100,000 inhabitants] | Number of dead patients | In-hospital mortality [%] | Number of hospitalized patients age <65 years | Number of hospitalized patients age 65+ years | Number of dead patients without comorbidities | Number of dead patients with one coexisting disease | Number of dead patients with two coexisting disease | Number of dead patients with three coexisting disease |
| 2401           | będziński           | 1145                            | 781.4                                        | 515.4                                               | 302                     | 26.4%                     | 439                                           | 706                                           | 74                                            | 151                                                 | 23                                                  | 54                                                    |
| 2402           | bielski             | 1174                            | 705.5                                        | 538.9                                               | 263                     | 22.4%                     | 462                                           | 712                                           | 43                                            | 52                                                  | 71                                                  | 97                                                    |
| 2461           | Bielsko-Biała       | 1408                            | 834.0                                        | 811.4                                               | 279                     | 19.8%                     | 457                                           | 951                                           | 60                                            | 60                                                  | 73                                                  | 86                                                    |
| 2414           | bieruński-łędziński | 386                             | 644.4                                        | 518.8                                               | 96                      | 24.9%                     | 168                                           | 218                                           | 25                                            | 19                                                  | 18                                                  | 34                                                    |
| 2462           | Bytom               | 1009                            | 621.9                                        | 410.5                                               | 273                     | 27.1%                     | 341                                           | 668                                           | 72                                            | 73                                                  | 50                                                  | 78                                                    |

|      |                      |      |        |       |     |       |     |      |     |     |     |     |
|------|----------------------|------|--------|-------|-----|-------|-----|------|-----|-----|-----|-----|
| 2463 | Chorzów              | 875  | 823.4  | 580.7 | 243 | 27.8% | 323 | 551  | 62  | 38  | 52  | 91  |
| 2403 | cieszyński           | 1748 | 987.4  | 704.9 | 366 | 20.9% | 637 | 1111 | 49  | 64  | 67  | 186 |
| 2464 | Częstochowa          | 2573 | 1191.7 | 763.5 | 490 | 19.0% | 928 | 1645 | 92  | 62  | 111 | 225 |
| 2404 | częstochowski        | 1279 | 957.0  | 681.4 | 246 | 19.2% | 467 | 812  | 50  | 31  | 49  | 116 |
| 2465 | Dąbrowa Górnicza     | 1037 | 882.4  | 568.6 | 257 | 24.8% | 384 | 653  | 71  | 96  | 28  | 62  |
| 2466 | Gliwice              | 1475 | 838.0  | 562.1 | 388 | 26.3% | 562 | 913  | 151 | 69  | 97  | 71  |
| 2405 | gliwicki             | 811  | 704.0  | 515.1 | 215 | 26.5% | 335 | 476  | 71  | 38  | 63  | 43  |
| 2467 | Jastrzębie-Zdrój     | 784  | 897.8  | 565.9 | 256 | 32.7% | 221 | 563  | 82  | 58  | 56  | 60  |
| 2468 | Jaworzno             | 702  | 781.5  | 517.5 | 229 | 32.6% | 242 | 460  | 90  | 34  | 49  | 56  |
| 2469 | Katowice             | 2037 | 704.4  | 462.9 | 577 | 28.3% | 799 | 1238 | 189 | 155 | 49  | 184 |
| 2406 | kłobucki             | 558  | 664.4  | 483.0 | 111 | 19.9% | 224 | 334  | 16  | 66  | 11  | 18  |
| 2407 | lubliniecki          | 468  | 617.2  | 454.9 | 116 | 24.8% | 193 | 275  | 14  | 15  | 23  | 64  |
| 2408 | mikołowski           | 621  | 625.7  | 484.1 | 177 | 28.5% | 262 | 359  | 43  | 47  | 30  | 57  |
| 2470 | Mysłowice            | 504  | 677.3  | 513.3 | 130 | 25.8% | 240 | 264  | 30  | 39  | 13  | 48  |
| 2409 | myszkowski           | 537  | 765.9  | 537.7 | 137 | 25.5% | 224 | 313  | 24  | 23  | 33  | 57  |
| 2471 | Piekary Śląskie      | 398  | 730.7  | 489.7 | 100 | 25.1% | 146 | 252  | 16  | 50  | 10  | 24  |
| 2410 | pszczyński           | 583  | 521.7  | 434.6 | 138 | 23.7% | 259 | 324  | 38  | 22  | 28  | 50  |
| 2411 | raciborski           | 697  | 651.6  | 454.1 | 206 | 29.6% | 277 | 420  | 90  | 21  | 47  | 48  |
| 2472 | Ruda Śląska          | 880  | 648.5  | 459.0 | 218 | 24.8% | 335 | 545  | 55  | 45  | 44  | 74  |
| 2412 | rybnicki             | 643  | 823.8  | 639.3 | 149 | 23.2% | 264 | 379  | 52  | 29  | 44  | 24  |
| 2473 | Rybnik               | 1177 | 862.5  | 630.3 | 274 | 23.3% | 487 | 690  | 93  | 68  | 57  | 56  |
| 2474 | Siemianowice Śląskie | 336  | 510.3  | 331.5 | 98  | 29.2% | 122 | 214  | 22  | 30  | 17  | 29  |
| 2475 | Sosnowiec            | 1775 | 905.7  | 545.3 | 473 | 26.6% | 599 | 1176 | 138 | 169 | 94  | 72  |
| 2476 | Świętochłowice       | 362  | 741.5  | 514.8 | 93  | 25.7% | 131 | 231  | 23  | 11  | 19  | 40  |
| 2413 | tarnogórski          | 992  | 704.6  | 504.0 | 240 | 24.2% | 398 | 593  | 43  | 55  | 45  | 97  |
| 2477 | Tychy                | 964  | 764.0  | 516.3 | 289 | 30.0% | 359 | 605  | 71  | 52  | 50  | 116 |
| 2415 | wodzisławski         | 1163 | 745.7  | 525.4 | 334 | 28.7% | 423 | 740  | 105 | 54  | 87  | 88  |
| 2478 | Zabrze               | 1328 | 782.0  | 526.4 | 308 | 23.2% | 541 | 787  | 97  | 60  | 78  | 73  |
| 2416 | zawierciański        | 865  | 746.0  | 475.5 | 189 | 21.8% | 295 | 570  | 19  | 31  | 17  | 122 |
| 2479 | Żory                 | 491  | 781.7  | 590.2 | 118 | 24.0% | 189 | 302  | 33  | 30  | 32  | 23  |
| 2417 | żywiecki             | 1090 | 718.4  | 533.9 | 267 | 24.5% | 434 | 656  | 44  | 51  | 89  | 83  |

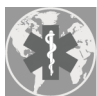

## Supplement 2

Number of hospitalized due to COVID-19, in the Silesian Voivodeship in 2020 and 2021, by municipalities

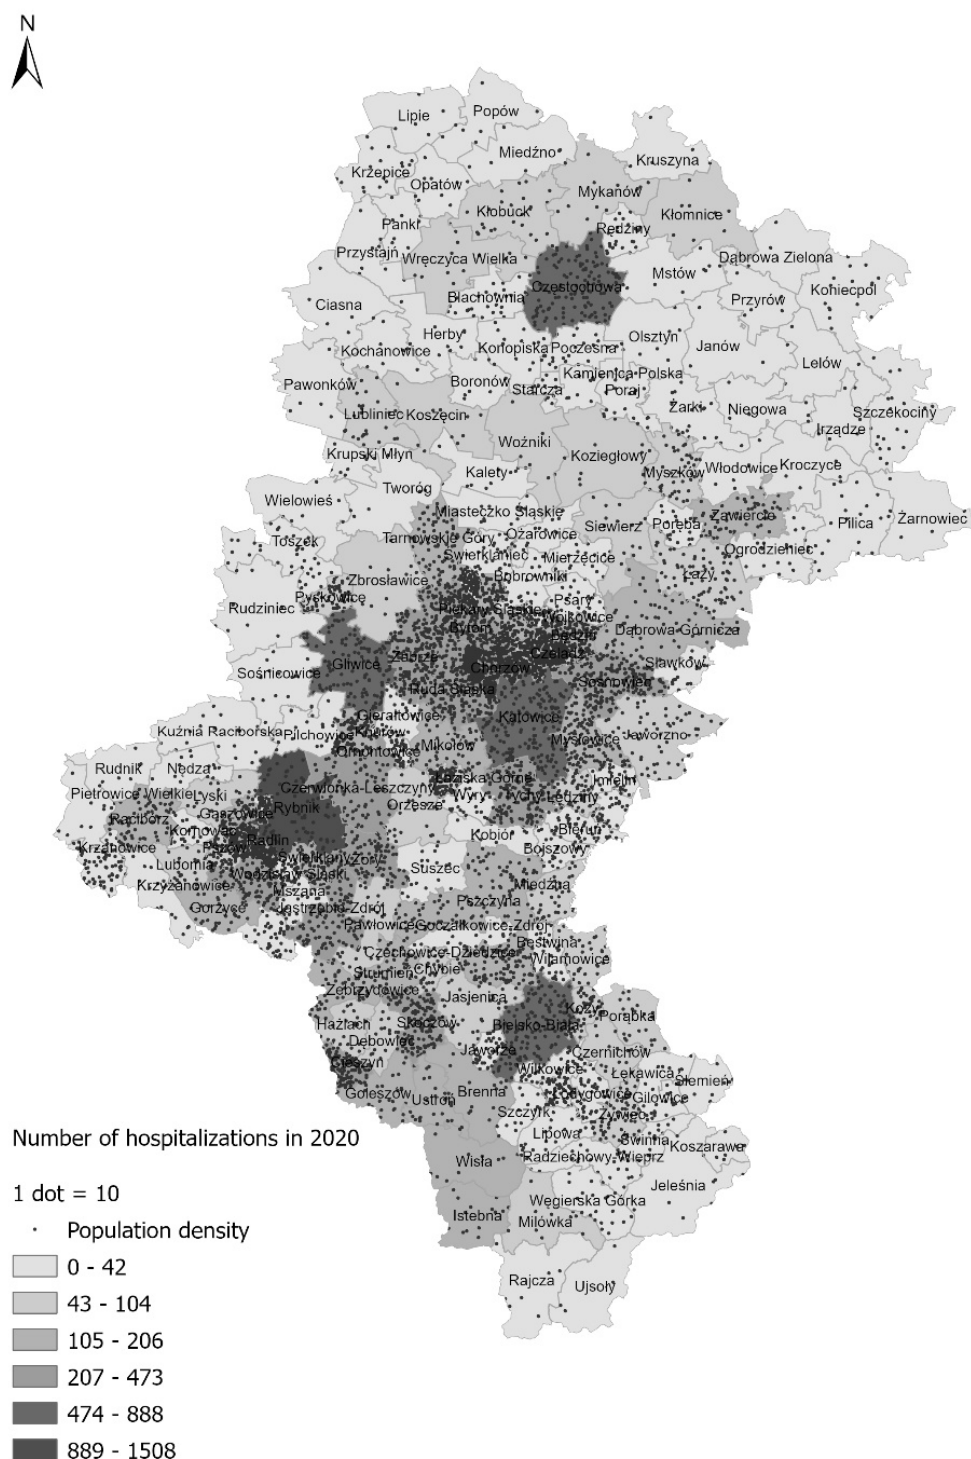

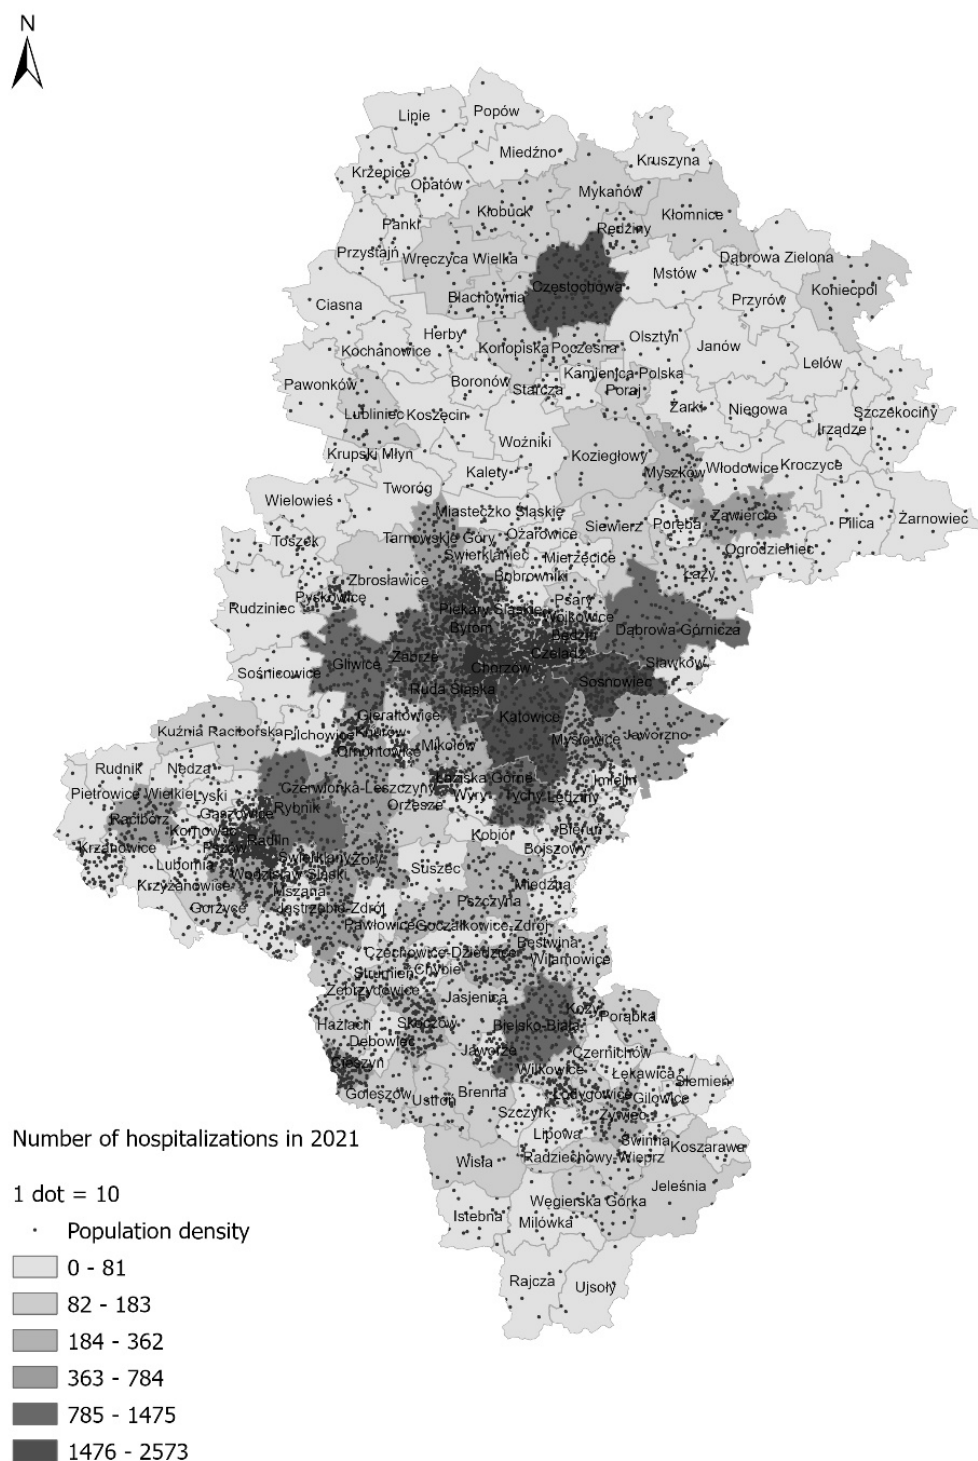

Supplement: s1 [file s1]
